# Supplementary material for: Inulin Exerts Beneficial Effects on Non-Alcoholic Fatty Liver Disease via Modulating gut Microbiome and Suppressing the Lipopolysaccharide-Toll-Like Receptor 4-Mψ-Nuclear Factor-κB-Nod-Like Receptor Protein 3 Pathway via gut-Liver Axis in Mice
Source: PubMed Central journal article supplement (PMC7774311; doi:10.3389/fphar.2020.558525), 2020-11-30
Supplement: datasheet1.pdf [file datasheet1.pdf]

1 . Data for Fig. 1B

| Groups/weight | Week 1       | Week 2       | Week 3       | Week 4       | Week 5       |
|---------------|--------------|--------------|--------------|--------------|--------------|
| ND            | 17.66 ± 1.03 | 19.55 ± 1.53 | 21.32 ± 2.09 | 24.42 ± 1.09 | 25.12 ± 1.22 |
| HFD           | 19.03 ± 1.29 | 22.67 ± 2.15 | 23.74 ± 1.91 | 25.12 ± 1.87 | 27.52 ± 2.01 |
| ND-INU        | 18.30 ± 1.02 | 20.06 ± 1.04 | 22.19 ± 1.13 | 23.45 ± 1.13 | 25.19 ± 1.13 |
| HFD-INU       | 21.02 ± 1.15 | 22.60 ± 1.05 | 23.72 ± 1.32 | 24.98 ± 1.21 | 26.68 ± 1.08 |

| Groups/weight | Week 6       | Week 7       | Week 8       | Week 9       | Week 10      |
|---------------|--------------|--------------|--------------|--------------|--------------|
| ND            | 25.89 ± 2.63 | 26.55 ± 1.13 | 27.20 ± 1.29 | 27.55 ± 1.39 | 27.99 ± 1.69 |
| HFD           | 29.43 ± 2.49 | 32.36 ± 2.15 | 35.07 ± 1.98 | 37.27 ± 1.51 | 37.98 ± 2.31 |
| ND-INU        | 25.79 ± 2.32 | 26.46 ± 1.24 | 27.54 ± 1.53 | 27.78 ± 1.13 | 27.98 ± 1.71 |
| HFD-INU       | 29.19 ± 2.85 | 30.45 ± 1.75 | 31.42 ± 0.87 | 32.72 ± 1.03 | 33.42 ± 1.20 |

| Groups/weight | Week 11      | Week 12      | Week 13      | Week 14      |
|---------------|--------------|--------------|--------------|--------------|
| ND            | 28.25 ± 1.53 | 28.65 ± 1.13 | 29.02 ± 1.59 | 29.87 ± 1.09 |
| HFD           | 38.73 ± 1.59 | 39.76 ± 1.85 | 40.47 ± 1.41 | 42.75 ± 1.31 |
| ND-INU        | 27.79 ± 1.32 | 28.22 ± 1.34 | 28.99 ± 1.63 | 29.54 ± 1.13 |
| HFD-INU       | 34.18 ± 1.65 | 35.02 ± 1.05 | 35.89 ± 2.08 | 36.32 ± 1.08 |

2. Data for Fig. 1C-E

| Groups  | Food intake  | Liver wight | Liver index |
|---------|--------------|-------------|-------------|
| ND      | 41.89 ± 0.75 | 1.09 ± 0.03 | 3.90 ± 0.09 |
| HFD     | 36.04 ± 2.36 | 2.06 ± 0.15 | 4.47 ± 0.21 |
| ND-INU  | 38.94 ± 1.44 | 1.06 ± 0.04 | 3.79 ± 0.13 |
| HFD-INU | 37.60 ± 2.00 | 1.60 ± 0.05 | 4.02 ± 0.08 |

3. Data for Fig. 2A, B, D-F

| Groups  | ALT          | AST           | TG          | TC          | Insulin      | HOMA-IR     |
|---------|--------------|---------------|-------------|-------------|--------------|-------------|
| ND      | 42.39 ± 2.02 | 45.00 ± 2.55  | 2.29 ± 0.07 | 0.58 ± 0.03 | 2.12 ± 0.74  | 0.51 ± 0.20 |
| HFD     | 91.19 ± 4.63 | 136.5 ± 5.93  | 4.16 ± 0.15 | 1.08 ± 0.10 | 16.84 ± 8.53 | 6.24 ± 1.37 |
| ND-INU  | 41.79 ± 3.14 | 45.62 ± 2.25  | 2.09 ± 0.09 | 0.65 ± 0.05 | 1.04 ± 0.20  | 0.31 ± 0.08 |
| HFD-INU | 64.74 ± 4.43 | 102.70 ± 4.86 | 3.69 ± 0.13 | 0.76 ± 0.05 | 7.99 ± 2.04  | 2.16 ± 0.43 |

4. Data for Fig. 2C

| Groups/Glucose | 0min         | 30min        | 60min        | 90min        | 120min       |
|----------------|--------------|--------------|--------------|--------------|--------------|
| ND             | 5.46 ± 0.83  | 24.15 ± 1.23 | 17.61 ± 1.89 | 11.35 ± 2.09 | 6.18 ± 1.29  |
| HFD            | 14.08 ± 1.09 | 28.95 ± 2.75 | 29.85 ± 2.21 | 23.16 ± 2.61 | 13.86 ± 1.81 |
| ND-INU         | 5.89 ± 0.62  | 19.95 ± 1.94 | 15.53 ± 2.13 | 12.52 ± 2.33 | 7.25 ± 2.13  |
| HFD-INU        | 10.08 ± 1.35 | 31.02 ± 3.20 | 26.80 ± 2.88 | 16.78 ± 1.58 | 11.43 ± 1.08 |

5. Data for Fig. 3C.

| Groups  | NAS         |
|---------|-------------|
| ND      | 0.60 ± 0.40 |
| HFD     | 4.60 ± 0.81 |
| ND-INU  | 0.40 ± 0.24 |
| HFD-INU | 3.00 ± 0.32 |

6. Data for Fig. 4C, D, F.

| Groups  | F480         | F480/TLR4   | F480         |
|---------|--------------|-------------|--------------|
| ND      | 17.07 ± 0.80 | 2.06 ± 0.16 | 25.63 ± 2.57 |
| HFD     | 29.19 ± 1.31 | 5.62 ± 0.30 | 65.83 ± 2.24 |
| ND-INU  | 17.14 ± 0.84 | 2.19 ± 0.08 | 28.63 ± 2.22 |
| HFD-INU | 23.53 ± 1.25 | 3.55 ± 0.30 | 41.17 ± 2.09 |

7. Data for Fig. 5B-E.

| Groups  | NLRP3       | Caspase-1   | ASC         | NF-κB       |
|---------|-------------|-------------|-------------|-------------|
| ND      | 1.18 ± 0.01 | 1.02 ± 0.08 | 0.55 ± 0.05 | 0.89 ± 0.11 |
| HFD     | 1.57 ± 0.04 | 1.61 ± 0.08 | 1.06 ± 0.13 | 1.47 ± 0.04 |
| ND-INU  | 1.33 ± 0.03 | 1.22 ± 0.02 | 0.66 ± 0.06 | 1.03 ± 0.07 |
| HFD-INU | 1.21 ± 0.03 | 1.27 ± 0.06 | 0.57 ± 0.04 | 1.22 ± 0.03 |

8. Data for Fig. 5 F, G, J, N, L, P

| Groups  | IL-1β        | IL-18        | LPS         | TNF-a        | IL-6        | IL-10        |
|---------|--------------|--------------|-------------|--------------|-------------|--------------|
| ND      | 24.73 ± 2.99 | 17.28 ± 1.99 | 0.13 ± 0.00 | 5.91 ± 0.31  | 2.72 ± 0.17 | 13.97 ± 1.02 |
| HFD     | 41.95 ± 3.31 | 40.82 ± 2.94 | 0.27 ± 0.01 | 12.07 ± 0.70 | 3.85 ± 0.35 | 12.35 ± 0.95 |
| ND-INU  | 28.43 ± 2.77 | 21.13 ± 2.08 | 0.12 ± 0.01 | 6.00 ± 0.45  | 2.03 ± 0.36 | 14.60 ± 1.08 |
| HFD-INU | 31.16 ± 2.52 | 31.71 ± 1.65 | 0.20 ± 0.01 | 8.82 ± 0.37  | 2.66 ± 0.21 | 17.70 ± 0.69 |

9. Data for Fig. 5 H, I, K, O, M

| Groups  | Liver IL-1β | Liver IL-18 | Liver LPS   | Liver TNF-a | Liver IL-6  |
|---------|-------------|-------------|-------------|-------------|-------------|
| ND      | 4.74 ± 0.25 | 5.18 ± 0.32 | 0.20 ± 0.00 | 1.56 ± 0.13 | 0.24 ± 0.03 |
| HFD     | 7.06 ± 0.64 | 8.30 ± 1.14 | 0.31 ± 0.02 | 5.35 ± 0.22 | 0.46 ± 0.05 |
| ND-INU  | 4.57 ± 0.53 | 5.56 ± 0.13 | 0.19 ± 0.01 | 1.28 ± 0.18 | 0.14 ± 0.04 |
| HFD-INU | 4.97 ± 0.32 | 5.39 ± 0.50 | 0.25 ± 0.00 | 3.17 ± 0.18 | 0.25 ± 0.03 |

10. Data for Fig. 7B-D

| Groups  | Acetic acid     | Propionic acid | Butyric acid  |
|---------|-----------------|----------------|---------------|
| ND      | 2330.00 ± 46.05 | 389.70 ± 4.69  | 417.80 ± 2.59 |
| HFD     | 734.00 ± 22.03  | 188.50 ± 3.63  | 159.00 ± 5.22 |
| ND-INU  | 2385.00 ± 49.05 | 535.10 ± 8.16  | 476.60 ± 5.78 |
| HFD-INU | 1906.00 ± 33.35 | 247.90 ± 17.94 | 180.00 ± 2.84 |
